# Supplementary material for: Common Single Nucleotide Polymorphisms in TCF7L2 Are Reproducibly Associated With Type 2 Diabetes and Reduce the Insulin Response to Glucose in Nondiabetic Individuals
Source: Oxford University Press journal article supplement (doi:10.2337/db06-0381), 2006-09-26
Supplement: pg2890onlineappendix1.doc [file pg2890onlineappendix1.doc]

| Supplementary Table 1: Association of *TCF7L2* SNPs with risk of type 2 diabetes | | | | | | | | | | | |  | | |
| --- | --- | --- | --- | --- | --- | --- | --- | --- | --- | --- | --- | --- | --- | --- |
| SNP | Position* | | Allele | Test (for untyped SNP) | | Test Allele(s) | r2** | Odds Ratio | 95% CI | | *P* | | | |
| rs4074718 | | 114738606 | T |  | |  | tag | 1.17 | 1.10-1.24 | | 6.53x10-7 | | | |
| rs11196181 | | 114739007 | A |  | |  | tag | 0.83 | 0.74-0.94 | | 0.0012 | | | |
| rs7901695 | | 114744077 | C |  | |  | tag | 1.32 | 1.23-1.42 | | 1.95x10-15 | | | |
| rs4506565 | | 114746030 | T | rs7896811,rs7895340 | | C,A | 1.00 | 1.29 | 1.20-1.38 | | 3.54x10-13 | | | |
| rs7903146 | | 114748338 | T |  | |  | tag | 1.40 | 1.30-1.50 | | 6.74x10-20 | | | |
| rs10885402 | | 114751686 | A | rs4074718,rs7895340 | | C,G | 0.97 | 0.87 | 0.82-0.93 | | 1.18x10-5 | | | |
| rs6585198 | | 114752226 | G | rs11196181,rs7895340 | | G,G | 1.00 | 0.88 | 0.84-0.94 | | 6.50x10-5 | | | |
| rs7896811 | | 114756706 | T |  | |  | tag | 0.85 | 0.78-0.93 | | 1.20x10-4 | | | |
| rs4132670 | | 114757760 | A | rs7896811,rs7895340 | | C,A | 1.00 | 1.29 | 1.20-1.38 | | 3.54x10-13 | | | |
| rs6585200 | | 114758598 | A | rs7896811,rs7895340 | | C,G | 1.00 | 0.88 | 0.83-0.94 | | 3.73x10-5 | | | |
| rs6585201 | | 114758772 | G | rs11196181,rs7895340 | | G,G | 1.00 | 0.88 | 0.84-0.94 | | 6.50x10-5 | | | |
| rs12354626 | | 114762418 | A |  | |  | tag | 0.97 | 0.81-1.17 | | 0.38 | | | |
| rs7904519 | | 114763916 | A | rs7896811,rs7895340 | | C,G | 1.00 | 0.88 | 0.83-0.94 | | 3.73x10-5 | | | |
| rs10885405 | | 114767659 | C | rs4074718,rs7895340 | | C,G | 0.97 | 0.88 | 0.83-0.94 | | 3.73x10-5 | | | |
| rs10885406 | | 114767713 | A | rs7896811,rs7077247 | | C,T | 0.97 | 0.88 | 0.82-0.94 | | 3.20x10-5 | | | |
| rs10787472 | | 114771286 | T | rs4074718,rs7895340 | | C,G | 0.97 | 0.88 | 0.83-0.94 | | 3.73x10-5 | | | |
| rs7924080 | | 114777001 | T | rs4074718,rs11196203 | | C,C | 0.97 | 0.87 | 0.81-0.92 | | 5.13x10-6 | | | |
| rs7077039 | | 114779066 | T | rs7895340 | | A | 0.93 | 1.14 | 1.07-1.22 | | 1.31x10-5 | | | |
| rs7100927 | | 114786037 | A | rs7895340 | | A | 1.00 | 1.14 | 1.07-1.22 | | 1.31x10-5 | | | |
| rs11196199 | | 114786106 | A | rs11196203 | | A | 1.00 | 0.89 | 0.83-0.97 | | 0.0037 | | | |
| rs17685538 | | 114787460 | G |  | |  | tag | 0.93 | 0.84-1.03 | | 0.077 | | | |
| rs11592706 | | 114788975 | T |  | |  | tag | 1.13 | 0.95-1.35 | | 0.082 | | | |
| rs7895340 | | 114791514 | A |  | |  | tag | 1.14 | 1.07-1.22 | | 1.31x10-5 | | | |
| rs11196200 | | 114791927 | C | rs7077247 | | C | 0.97 | 1.06 | 1.00-1.13 | | 0.03 | | | |
| rs11196203 | | 114795849 | A |  | |  | tag | 0.89 | 0.83-0.97 | | 0.0037 | | | |
| rs11196205 | | 114797036 | C |  | |  | tag | 1.14 | 1.07-1.21 | | 2.50x10-5 | | | |
| rs10885409 | | 114798061 | T | rs7077247 | | C | 1.00 | 1.06 | 1.00-1.13 | | 0.03 | | | |
| rs12255372 | | 114798891 | T |  | |  | tag | 1.30 | 1.21-1.40 | | 4.07x10-13 | | | |
| rs12265291 | | 114800229 | T | rs7077247 | | C | 1.00 | 1.06 | 1.00-1.13 | | 0.03 | | | |
| rs11196208 | | 114801305 | T | rs7077247 | | C | 1.00 | 1.06 | 1.00-1.13 | | 0.03 | | | |
| rs7077247 | | 114802060 | C |  | |  | tag | 1.06 | 1.00-1.13 | | 0.03 | | | |
| rs12718338 | | 114803036 | C | rs11196205 | | C | 1.00 | 1.14 | 1.07-1.21 | | 2.50x10-5 | | | |
| Untested variants | | |  |  |  | |  | |  |  | | |  | |
| rs12243326 | |  | 114778804 |  | |  |  |  |  | |  | | | |
| rs11196187 | |  | 114749434 |  | |  |  |  |  | |  | | | |
| rs17747324 | |  | 114742492 |  | |  |  |  |  | |  | | | |
| rs12266632 | |  | 114754948 |  | |  |  |  |  | |  | | | |
| rs11196192 | |  | 114772276 |  | |  |  |  |  | |  | | | |
| rs11196201 | |  | 114793296 |  | |  |  |  |  | |  | | | |
| rs4132115 | |  | 114745485 |  | |  |  |  |  | |  | | | |
| rs7068741 | |  | 114746247 |  | |  |  |  |  | |  | | | |
| rs7069007 | |  | 114746274 |  | |  |  |  |  | |  | | | |
| rs12098651 | |  | 114751708 |  | |  |  |  |  | |  | | | |
| rs4319449 | |  | 114759395 |  | |  |  |  |  | |  | | | |
| rs7081912 | |  | 114789080 |  | |  |  |  |  | |  | | | |
| * NCBI Build 35 Chr 10; ** r2 between test and predicted SNP; data for all nine samples combined by Mantel-Haenszel meta-analysis of the ORs | | | | | | | | | | | | | |  |
