# Supplementary material for: Common Single Nucleotide Polymorphisms in TCF7L2 Are Reproducibly Associated With Type 2 Diabetes and Reduce the Insulin Response to Glucose in Nondiabetic Individuals
Source: Oxford University Press journal article supplement (doi:10.2337/db06-0381), 2006-09-26
Supplement: pg2890onlineappendix2.doc [file pg2890onlineappendix2.doc]

| Supplementary Table 2. Analysis of epistasis between *TCF7L2* SNP rs7903146 and *PPARγ*-P12A / *KIR6.2*-E23K | | | | |  | |
| --- | --- | --- | --- | --- | --- | --- |
| SNPs | N | ORint | z | *P** | |  |
| **Case-controls** | 6161 |  |  |  | |  |
| rs7903146 - PPARγ(P12A) |  | 0.90 | 1.24 | 0.22 | |  |
| rs7903146 - KIR6.2(E23K) |  | 0.88 | 2.10 | 0.035 | |  |
| **Cases only** | 3029 |  |  |  | |  |
| rs7903146 - PPARγ(P12A) |  | 0.95 | 0.98 | 0.33 | |  |
| rs7903146 - KIR6.2(E23K) |  | 0.90 | 2.52 | 0.012 | |  |
| ORint, Interaction Odds Ratio; Z, z-score of interaction; *two-tailed *P* | | | | | |  |
